# Supplementary material for: Genetic Variants on Chromosome 1q41 Influence Ocular Axial Length and High Myopia
Source: PubMed Central journal article supplement (PMC3369958; doi:10.1371/journal.pgen.1002753), 2012-06-07

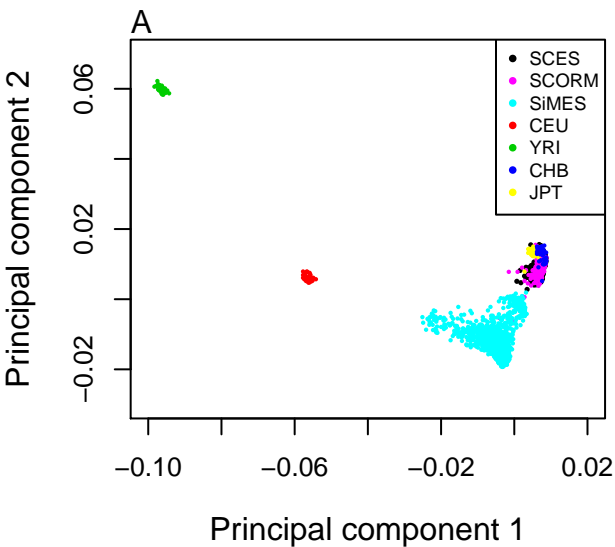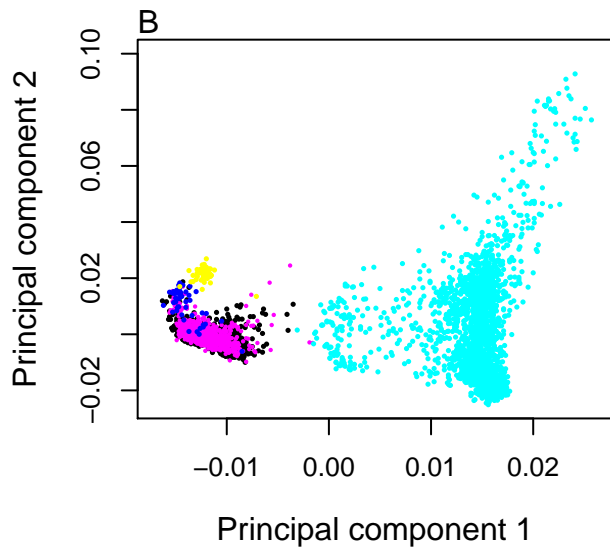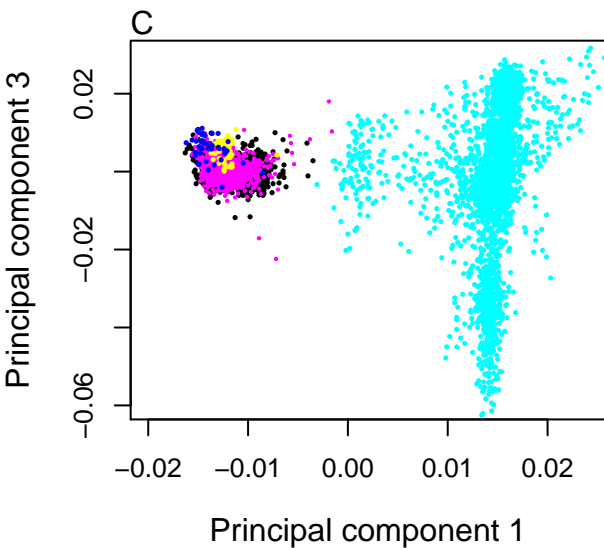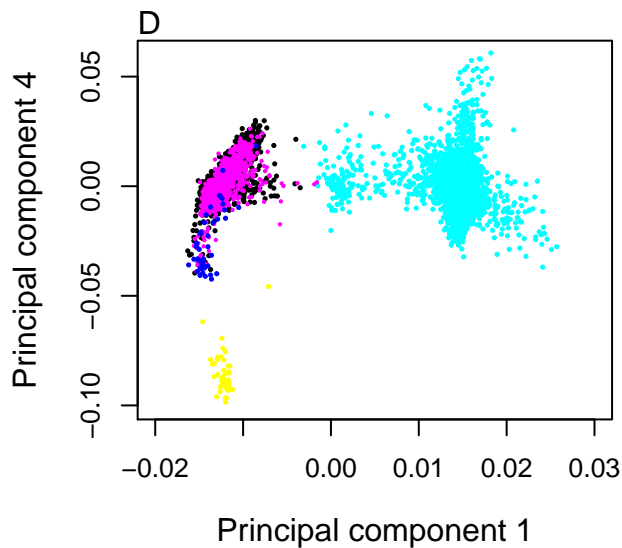

Supplement: pgen.1002753.s001.pdf [file pgen.1002753.s001.pdf]
