# Supplementary material for: Genetic Variants on Chromosome 1q41 Influence Ocular Axial Length and High Myopia
Source: PubMed Central journal article supplement (PMC3369958; doi:10.1371/journal.pgen.1002753), 2012-06-07

**A**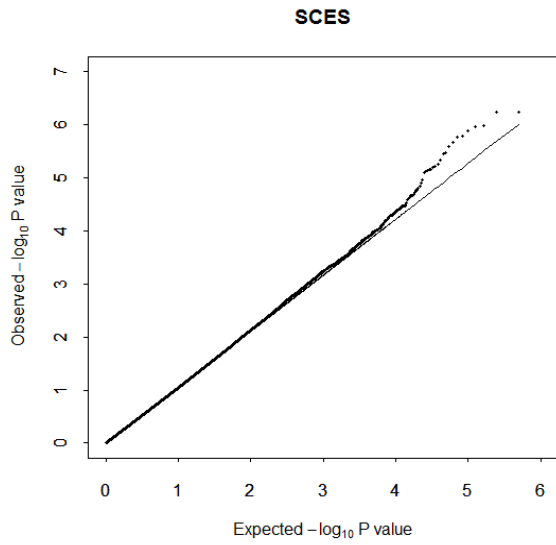**B**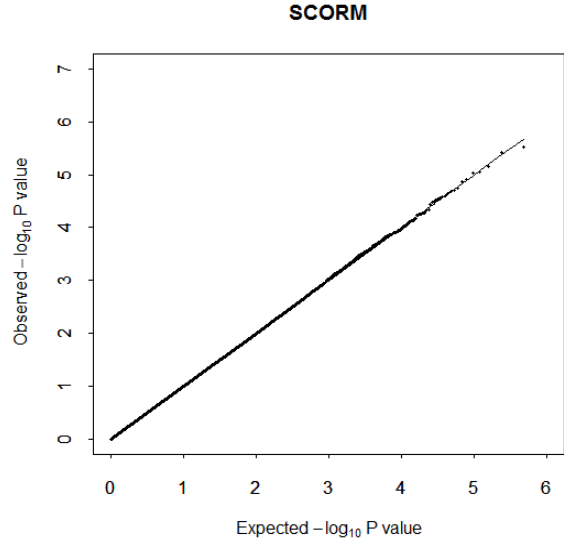**C**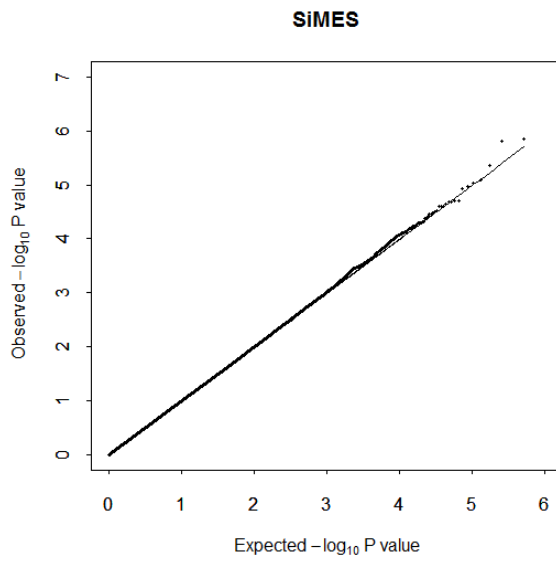**D**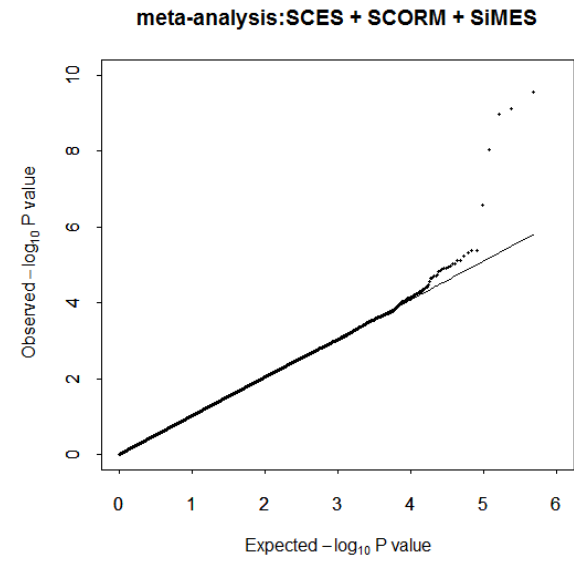

Supplement: pgen.1002753.s002.pdf [file pgen.1002753.s002.pdf]
